# Supplementary material for: The Emotional Landscape of Pregnancy and Post-Partum during COVID-19 Pandemic in Italy. A Mixed-Method Analysis Using Artificial Intelligence
Source: Preprints.org preprint supplement (doi:10.20944/preprints202309.0643.v1), 2023-09-11
Supplement: Supplementary file 1 [file supplementary]

## **Table S1.** Word count and frequency of emotions before and during the pandemic.

## Pre – Covid

Total: 3850 words

| Weight | Word | Italian words and sinonyms |
| --- | --- | --- |
| 276 | Happiness | felicità, felice |
| 196 | Joy | gioia |
| 192 | Exciting | emozionante, eccitazione, eccitato |
| 149 | Emotion | emozione, emozioni |
| 138 | Shared | condiviso |
| 104 | Sharing | condivisione, condividere |
| 102 | Family | famiglia |
| 101 | Calm | sereno, calmo |
| 96 | Painful | doloroso |
| 89 | Tranquility | tranquillo, tranquilla, tranquillità |
| 84 | Husband | marito |
| 83 | Pain | dolore |
| 69 | Love | amore |
| 67 | Serenity | serenità |
| 54 | Fear | paura |
| 37 | Joyful | gioioso |
| 37 | Safety | sicurezza |
| 24 | Support | sostegno, supporto |
| 21 | Anxiety | ansia |
| 20 | Intense | intenso |
| 18 | Hope | speranza |
| 17 | Exhausting | faticoso |
| 16 | Festivity | festa |
| 16 | Assisted | assistito |
| 15 | Relatives | parenti |
| 12 | Life | vita |
| 12 | Union | unione |
| 12 | Water | acqua |
| 11 | Unforgettable | indimenticabile |
| 11 | Welcome | accoglienza |
| 10 | Friends | amici |
| 10 | Relieving | liberatorio |

## Post – Covid

Total: 3872 words

| Weight | Word | Italian words and sinonyms |
| --- | --- | --- |
| 319 | Fear | paura, pauroso, terrore, spavento, timore |
| 190 | Anxiety | ansia, ansiogeno, ansioso, angoscia, agitato, angosciante, inquietudine, tensione, apprensione |
| 179 | Loneliness | solitudine, isolamento, solitario, sola, isolato, abbandonata, solitaria |
| 34 | Joy | felicità, gioia, felice, gioioso |
| 32 | Excitement | emozionante, coinvolgente, appagante, elettrizzante |
| 25 | Hope | speranza, speranzosa, ottimismo |
| 25 | Uncertainty | imprevedibilità, incertezza, incerto |
| 20 | Distance | lontananza, distanza |
| 19 | Concern | preoccupante, preoccupata, preoccupazione |
| 19 | Detachment | distacco, separata, separazione |
| 16 | Family | famiglia, marito, padre, figlio, bambino, coniuge, figlia, genitori, partner, madre, nonna, materna |
| 12 | Contagion | contagio |
| 10 | Danger | pericolo, pericoloso |
| 10 | Risk | rischio |
| 8 | Coldness | freddezza, freddo |
| 4 | Hurried | frettoloso, affrettato |
| 4 | Restrictions | restrittivo, restrizioni |
| 3 | Disappointment | delusione, delusa |

Full list of words is published as raw data in Ravaldi & Vannacci (2020) *COVID-ASSESS Italy—COVID19 related Anxiety and StreSs in prEgnancy, poSt-partum and breaStfeeding* [Data set]. Mendeley. <https://doi.org/10.17632/CN38PBWN7R.1>
